# Supplementary material
Source: PubMed Central journal article supplement (PMC5107309)
Supplement: NIHMS813044-supplement-Supplement.pdf [file NIHMS813044-supplement-Supplement.pdf]

**Supplementary information S1: Relevance of nematode and fruit fly sirtuins to longevity**

Following the discovery of the budding yeast sirtuin Sir2p (silent information regulator 2) as a longevity factor, Sir2 homologs were tested in *Caenorhabditis elegans* (Sir2.1)<sup>1</sup> and *Drosophila melanogaster* (dSir2)<sup>2</sup> and their overexpression was reported to extend lifespan by 25-50%. Subsequently, the ability of sirtuins to extend lifespan was contradicted by a study that indicated the robustness of the lifespan extension in the original worm study was an artifact caused by a linked mutation<sup>3</sup>. The results from overexpression of fly dSir2 were also questioned<sup>3</sup>. An accompanying article declared these data the “final nail in the coffin” for the idea that sirtuins are involved in aging<sup>4</sup>.

In the past few years however, new data have largely settled the debate. With regards to the nematode work, independent laboratories have shown that Sir2.1 overexpression extends longevity up to 10-25%<sup>5-7</sup>, consistent with the original report<sup>1</sup>. It was also independently verified that Sir2.1 and Pnc1, an NAD salvage pathway gene that extends lifespan in yeast and flies, are both required for calorie restriction to extend lifespan<sup>8</sup>, a finding consistent with a recent report that resveratrol and oxyresveratrol extend lifespan in a Sir2.1-dependent manner<sup>9</sup>.

The initial fly work<sup>2</sup> was also repeated using an inducible “gene switch” system to temporally regulate the levels of dSir2 expression in adult flies and circumvent criticisms of the first paper<sup>10</sup>. When compared to genetically identical backcrossed controls, low and high levels of dSir2 overexpression (<2 fold and >5 fold, respectively) failed to extend longevity but moderate overexpression (2-5 fold) provided at least a 15% extension of longevity. This result is consistent with other work in species such as yeast and mice clearly demonstrating that high levels of Sir2p or SIRT1 are deleterious (reviewed in<sup>11</sup>).

Further support for fly Sir2 being a longevity gene has come from two recent reports. One showed that fat-body-specific overexpression of dSir2 extends fly lifespan, mimics calorie restriction and is necessary for the effects of calorie restriction<sup>12, 13</sup>. The other showed the effects of resveratrol on fly longevity are reproducible but possibly sexually dimorphic and dependent on upon nutrient composition<sup>14</sup>. Taken together, the weight of the evidence is that sirtuins are mediators of lifespan extension by calorie restriction, not only in yeast, but in nematodes and fruit flies (Table 1).

**Reference List**

1. Tissenbaum, H.A. & Guarente, L. Increased dosage of a sir-2 gene extends lifespan in *Caenorhabditis elegans*. *Nature* **410**, 227-230 (2001).

2. Rogina,B. & Helfand,S.L. Sir2 mediates longevity in the fly through a pathway related to calorie restriction. *Proc. Natl. Acad. Sci. U. S. A* **101**, 15998-16003 (2004).
3. Burnett,C. *et al.* Absence of effects of Sir2 overexpression on lifespan in *C. elegans* and *Drosophila*. *Nature* **477**, 482-485 (2011).
4. Lombard,D.B., Pletcher,S.D., Canto,C., & Auwerx,J. Ageing: longevity hits a roadblock. *Nature* **477**, 410-411 (2011).
5. Viswanathan,M. & Guarente,L. Regulation of *Caenorhabditis elegans* lifespan by sir-2.1 transgenes. *Nature* **477**, E1-E2 (2011).
6. Rizki,G. *et al.* The evolutionarily conserved longevity determinants HCF-1 and SIR-2.1/SIRT1 collaborate to regulate DAF-16/FOXO. *PLoS. Genet.* **7**, e1002235 (2011).
7. Schmeisser,K. *et al.* Role of sirtuins in lifespan regulation is linked to methylation of nicotinamide. *Nat. Chem. Biol.* **9**, 693-700 (2013).
8. Moroz,N. *et al.* Dietary restriction involves NAD(+) -dependent mechanisms and a shift toward oxidative metabolism. *Aging Cell* **13**, 1075-1085 (2014).
9. Lee,J., Kwon,G., Park,J., Kim,J.K., & Lim,Y.H. SIR-2.1-dependent lifespan extension of *Caenorhabditis elegans* by oxyresveratrol and resveratrol. *Exp. Biol. Med. (Maywood.)* (2016).
10. Whitaker,R. *et al.* Increased expression of *Drosophila* Sir2 extends life span in a dose-dependent manner. *Aging (Albany. NY)* **5**, 682-691 (2013).
11. Sinclair,D. & Verdin,E. The longevity of sirtuins. *Cell Rep.* **2**, 1473-1474 (2012).
12. Banerjee,K.K. *et al.* dSir2 in the adult fat body, but not in muscles, regulates life span in a diet-dependent manner. *Cell Rep.* **2**, 1485-1491 (2012).
13. Banerjee,K.K., Ayyub,C., Sengupta,S., & Kolthur-Seetharam,U. dSir2 deficiency in the fatbody, but not muscles, affects systemic insulin signaling, fat mobilization and starvation survival in flies. *Aging (Albany. NY)* **4**, 206-223 (2012).
14. Wang,C. *et al.* The effect of resveratrol on lifespan depends on both gender and dietary nutrient composition in *Drosophila melanogaster*. *Age (Dordr. )* **35**, 69-81 (2013).
